# Supplementary material
Source: publisher figshare collection journal article supplement (https://sage.figshare.com/ndownloader/files/15778694)
Supplement: Supplementary file 1 [file 15778694]

| **Demographics** | **Deceased without Palliative Care** | **Living with Palliative Care** | **p-value** |
| --- | --- | --- | --- |
| **Number of patients** | 30 | 30 |  |
| **Race**  (C:AA:Other) | 28:2:0 | 24:6:0 |  |
| **Age at consult**  Mean (SD) | 75 (10) | 70 (8.4) | p=0.72 |
| **FEV1 (% )**  Mean (SD) | 48% (18) | 34% (15) | **p=0.002** |
| **DLCO (%)**  Mean (SD) | 52% (15) | 36% (12) | **p=0.0002** |
| **Charlson Weighted Index of Comorbidity** (IQR) | 6 (5-9) | 2 (2-4) | **p<0.0001** |
| **Disease Exacerbations in the year preceeding**  **Palliative Care consult**  Mean (SD) | 0.6 (1.2) | 1.5 (1.4) | **p=0.0006** |

Table S1.
